# Supplementary material
Source: Springer Nature journal article supplement (https://www.springermedizin.de/resource/supplementary/13019_2009_183_MOESM1_ESM.pdf/9638018)

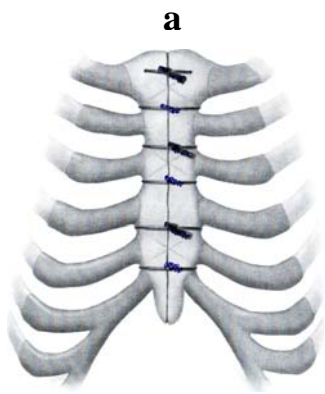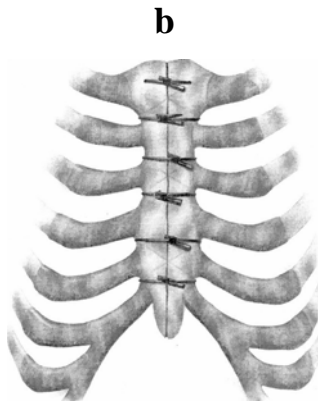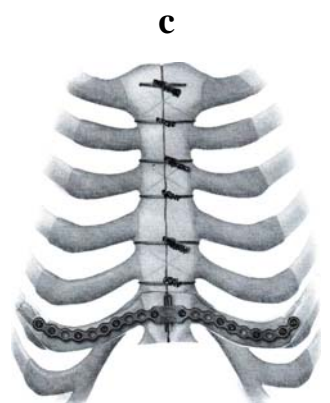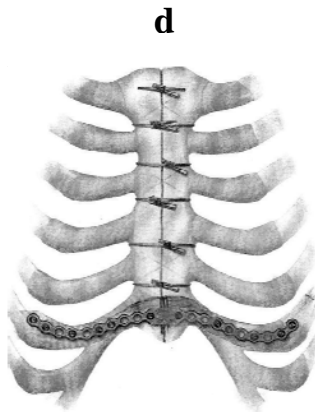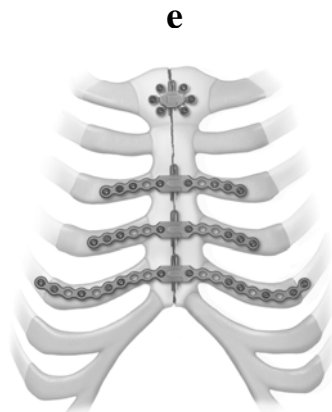

- a) wires alone,
- b) cables alone,
- c) wires + 1-plate,
- d) cables + 1-plate,
- e) 4-plates.

Supplement: MOESM1 [file 9638018]
